# Supplementary material for: Hierarchical LiNi0.8Co0.15Al0.05O2 plates with exposed {010} active planes as a high performance cathode material for Li-ion batteries
Source: Royal Society of Chemistry journal article supplement (doi:10.1039/c6ra02694j), 2016-01-01
Supplement: c6ra02694j1.pdf [file c6ra02694j1.pdf]

## Electronic supplementary information

### **Hierarchical $\text{LiNi}_{0.8}\text{Co}_{0.15}\text{Al}_{0.05}\text{O}_2$ plates with exposed {010} active planes as high performance cathode material for Li-ion battery**

Zhen Wang,<sup>ab</sup> Heng Liu,<sup>a</sup> Jian Wu,<sup>b</sup> Woon-Ming Lau,<sup>b</sup> Jun Mei,<sup>b</sup> Hao Liu,<sup>b\*</sup> Guobiao Liu<sup>b\*</sup>

<sup>a</sup> School of Materials Science and Engineering, Sichuan University, Chengdu 610065, China.

<sup>b</sup> Chengdu Green Energy and Green Manufacturing Technology R&D Center, Chengdu Development Center of Science and Technology, China Academy of Engineering Physics, Chengdu 610207, China.

\* Corresponding authors: Hao Liu      E-mail: mliuhao@gmail.com

Guobiao Liu      E-mail: guobiaoliu@sina.com

#### **Part 1 Experimental Section**

##### **Material Synthesis**

##### ***Synthesis of Flower-like Precursor***

Flower-like precursor was prepared via a solvothermal method. Specific experimental process is as follows: using 3 mmol of  $\text{Ni}(\text{NO}_3)_2 \cdot 6\text{H}_2\text{O}$  and  $\text{Co}(\text{NO}_3)_2 \cdot 6\text{H}_2\text{O}$  (the cationic ratio of Ni: Co = 80: 15) as the solutes, 0.1 g of polyvinylpyrrolidone (PVP,  $M_w = 29,000 \text{ g mol}^{-1}$ ) as the template and surfactant, 60 ml of a mixture containing ethanol and deionized water (the volumetric ratio of ethanol and deionized water = 1:1) as the solvent. The mixed solution was transferred

to a 100 ml teflon-lined stainless steel autoclave after stirred for 30 minutes and then heated at 180 °C for 12 h. The prepared precipitant was washed using distilled water and dried at 50°C for 12 h in a vacuum oven to obtain the precursor. In order to avoid breaking apart of the secondary particles for target  $\text{LiNi}_{0.8}\text{Co}_{0.15}\text{Al}_{0.05}\text{O}_2$ , the as-synthesized precursor was then heated at 300 °C for 3 h.

#### ***Synthesis of Hierarchical $\text{LiNi}_{0.8}\text{Co}_{0.15}\text{Al}_{0.05}\text{O}_2$ Plates (HP-NCA)***

Hierarchical  $\text{LiNi}_{0.8}\text{Co}_{0.15}\text{Al}_{0.05}\text{O}_2$  plates were prepared via a solid state method. The heated precursor was mixed with a stoichiometric amount of  $\text{Al}(\text{OH})_3$  and an excess amount of  $\text{LiOH}\cdot\text{H}_2\text{O}$  (5 wt%). Then the mixture was heated in oxygen atmosphere at 500 °C for 5 h and extra 750 °C for 18 h to obtain the final product.

#### ***Synthesis of $\text{LiNi}_{0.8}\text{Co}_{0.15}\text{Al}_{0.05}\text{O}_2$ Spherical Micro-particles (SP-NCA)***

The commercial precursor purchased from Henan New Taihang Power Source Co., Ltd was also heated at 300 °C for 3 h. The  $\text{LiNi}_{0.8}\text{Co}_{0.15}\text{Al}_{0.05}\text{O}_2$  spherical micro-particles were synthesized via the same procedure described in the synthesis of HP-NCA.

### **Characterization**

The surface morphology and microstructure were examined using scanning electronic microscopy (SEM, Hitachi S-4500) and transmission electronic microscopy (TEM, JEOL-2100). The elemental analysis was conducted by EDX transmission electronic microscopy (TEM, JEOL-2100). The crystal phases of HP-NCA and SP-NCA were characterized by X-ray diffraction (XRD, Philips, X' pert TRO MPD) using  $\text{Cu K}\alpha$  radiation ( $\lambda = 1.5418 \text{ \AA}$ ) at room temperature. The compositions of HP-

NCA and SP-NCA were measured by inductively coupled plasma (ICP, Perkin Elmer, Optima 8000).

### **Electrochemical Measurements**

The electrochemical properties of HP-NCA and SP-NCA were tested by CR2032 coin-type lithium half-cells. To prepare the positive electrode, 80 wt% cathode materials, 13 wt% acetylene black and 7 wt% polyvinylidene fluoride (PVDF) were dissolved in N-methyl-2-pyrrolidone (NMP). The slurry was coated uniformly onto the aluminum foil which was selected as the current collector of the positive electrode. The cathode film was dried at 120 °C overnight in a vacuum oven. The electrodes were cut into disks with a diameter of 1.6 cm. The average mass loading was about 3.0 mg cm<sup>-2</sup>. A lithium metal foil was used as the negative electrode. A porous polyethylene film (Celgard 2500) was selected as the separator. The electrolyte is a mixed solution of LiPF<sub>6</sub> in ethylene carbonate, dimethyl carbonate and ethyl methyl carbonate ( $V_{EC}:V_{DMC}:V_{EMC} = 1:1:1$ ). The CR2032 type coin cells were assembled in an argon-filled glove box. The charge and discharge performances of HP-NCA and SP-NCA were conducted on an Arbin instrument (BT-2043) at room temperature. The electrochemical impedance spectra of HP-NCA and SP-NCA were gained on a PARSTAT 4000 workstation in the frequency range from 0.01 Hz to 0.1 MHz and in the perturbation amplitude of 10 mV. Nyquist plots were collected and analyzed using ZSimpWin software.

### **Part 2 Supporting Figures and Tables**

**Table S1** Element molar ratios of HP-NCA and SP-NCA from ICP analysis.

|        | Element       | Li     | Ni     | Co     | Al     |
|--------|---------------|--------|--------|--------|--------|
| HP-NCA | Content (ppm) | 2.8529 | 19.159 | 3.5778 | 0.5602 |
|        | Molar ratio   | 1      | 0.7935 | 0.1498 | 0.0567 |
| SP-NCA | Content (ppm) | 2.5473 | 17.075 | 3.2155 | 0.5091 |
|        | Molar ratio   | 1      | 0.7911 | 0.1493 | 0.0596 |

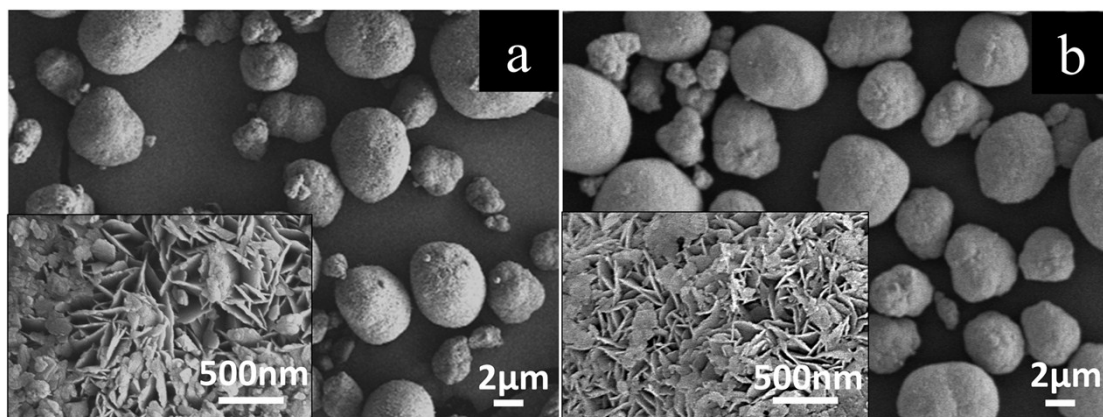

**Fig. S1** SEM images of (a) commercial precursor, (b) heated commercial precursor.

Insets are the SEM images at high magnification.

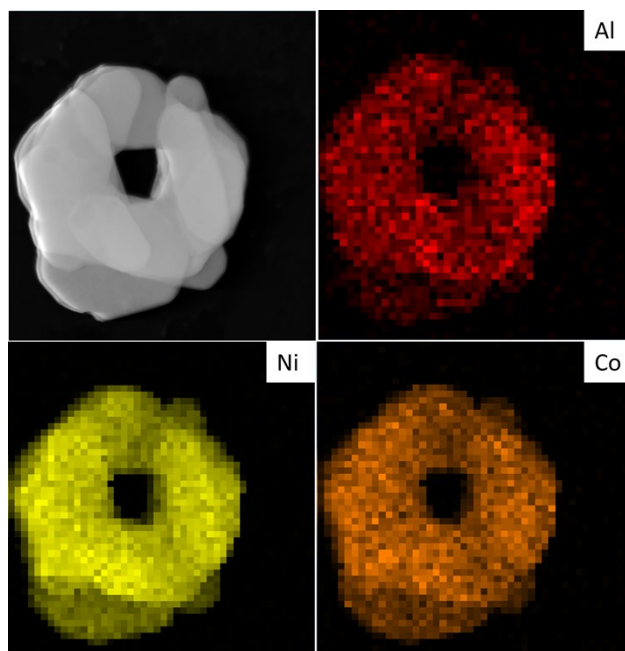

**Fig. S2** EDX-mapping images for Ni, Co and Al in HP-NCA.

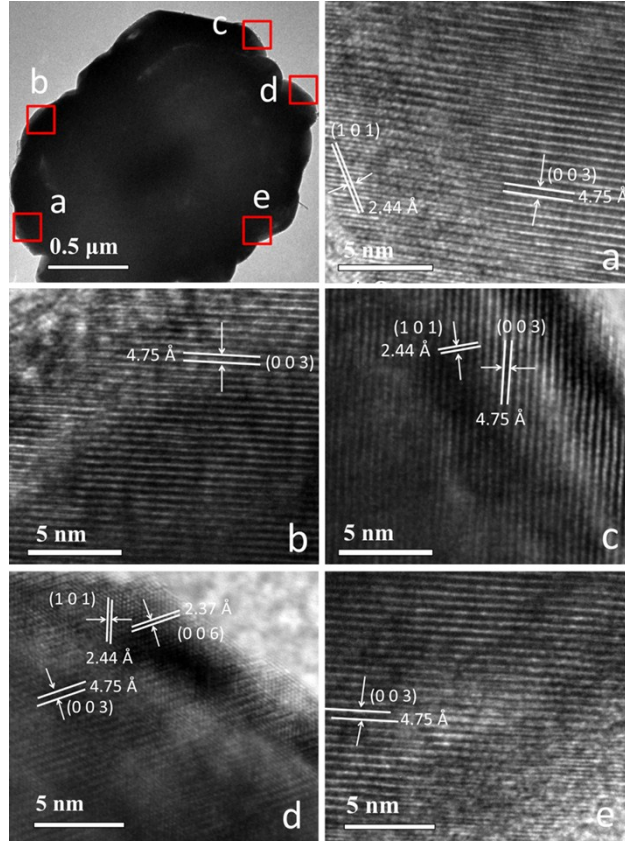

**Fig. S3** TEM and HR-TEM images of SP-NCA.

**Table S2** The values of  $R_e$ ,  $R_{SEI}$ ,  $R_{ct}$  and  $D_{Li^+}$  of HP-NCA and SP-NCA

|        | $R_e / \Omega$ | $R_{SEI} / \Omega$ | $R_{ct} / \Omega$ | $D_{Li^+} / \text{cm}^2 \text{s}^{-1}$ |
|--------|----------------|--------------------|-------------------|----------------------------------------|
| HP-NCA | 5.795          | 8.064              | 80.51             | $5.53 \times 10^{-15}$                 |
| SP-NCA | 5.022          | 7.538              | 192.5             | $1.40 \times 10^{-15}$                 |
